## 12 **Abstract**

13 The current study investigates the seroprevalence of the Hepatitis C Virus (HCV) among sex workers in  
14 Pakistan, a task made challenging due to social and cultural barriers. Our primary objectives were to gauge  
15 the extent of HCV exposure in this marginalized group, identify disparities in seroprevalence between  
16 sexes, and examine the association between seropositivity and various demographic and risk factors. We  
17 enrolled 1,000 participants, predominantly male (87.7%) and female (12.3%) sex workers. The majority  
18 fell within the 26-35 years age category (39.9%). A significant proportion (47.1%) had not received formal  
19 education. Overall, HCV antibodies were found in 15% of the participants. Disparities were evident with a  
20 seroprevalence of 13% in male sex workers and a significantly higher 31% in female sex workers. HCV  
21 seropositivity increased with age, with female sex workers showing a sharper rise. A link between levels  
22 of formal education and HCV seroprevalence was observed, with female sex workers consistently  
23 exhibiting higher seroprevalence across educational levels. Risk factors such as shaving practices, sharing  
24 of blades, surgical history, and other medical exposures were assessed, revealing higher HCV seropositivity  
25 rates among those exposed, especially pronounced among female participants. Despite the societal  
26 challenges, this research paves the way for future investigations and interventions tailored to this  
27 population's unique needs and vulnerabilities.

28

## 29 **Keywords**

30 HCV; Seroprevalence; HCV risk factors; Sex workers

## 31 **Introduction**

32 Hepatitis C virus (HCV) infection remains a significant global health concern, exhibiting considerable  
33 prevalence variations across diverse populations and geographical regions (1-5). This variability is  
34 attributed to multiple factors, including disparities in socioeconomic conditions, accessibility to healthcare  
35 services, and the availability of harm reduction programs (6, 7). Predominantly, HCV infection affects two  
36 age demographics: individuals aged 20-40 years and those over 50 years (8-11).

37 Transmission of HCV is primarily through exposure to contaminated blood, occurring through means such  
38 as contaminated surgical instruments, blood transfusions, and sharing needles or syringes (2, 12). While the  
39 risk of sexual transmission is generally lower, it is notably elevated among certain populations, including  
40 sex workers (13-15), due to risk behaviors that facilitate acquiring and transmitting these viruses through  
41 sexual and parenteral routes (2, 13).

42 Previous research shows significant disparities in HCV prevalence among sex workers across various  
43 regions and demographics. For instance, a study conducted in Glasgow highlighted an alarming 81% HCV  
44 seroprevalence among female sex workers who inject drugs, significantly surpassing the rates for general  
45 injecting drug users in Glasgow and any recorded in the UK from 1991 to 2005 (15). Conversely, a  
46 Canadian study reported a baseline prevalence of 42.7% among female sex workers. This study also showed  
47 that HCV incidence was highest among women who inject drugs. They also reported higher HCV  
48 prevalence among women living with sexually transmitted infections or HIV. Moreover, the use of non-  
49 injection stimulants was found to be associated with HCV seroconversion (14). Other studies also reported  
50 varying prevalence rates and associated risk factors, emphasizing the diverse nature of HCV prevalence  
51 among sex worker populations globally (16, 17).

52 In Pakistan, a nation confronting one of the most substantial burdens of HCV, the vulnerability of male and  
53 female sex workers is accentuated. Nevertheless, a pronounced void exists in exhaustive research dedicated  
54 to these demographics, notably in an environment characterized by significant impediments to education

55 and healthcare. With a staggering approximation of 10 million individuals living with HCV in Pakistan, the  
56 dearth of intricate data on HCV seroprevalence within the sex worker community is palpable (18-20).  
57 To bridge this informational gap, the presented work aimed to study the HCV seroprevalence among male  
58 and female sex workers and examine the associated risk factors. The undertaking of research within such  
59 marginalized communities as the sex workers in Pakistan mandated an approach imbued with collaboration  
60 and empathy. To this end, we established a partnership with *Dostana*, an organization steadfastly dedicated  
61 to the empowerment and health advocacy of vulnerable communities. This alliance enabled an effective  
62 and considerate engagement with the sex worker community in Pakistan, ensuring the study was conducted  
63 with due deference while addressing the distinctive needs and challenges faced by this community.

## 64 **Methodology**

### 65 **Research Design and Participant Selection**

66 This cross-sectional study determines the seroprevalence of the Hepatitis C Virus (HCV) among sex  
67 workers in Pakistan. A total of 1000 participants, male and female, were included in this study. The  
68 inclusion criteria stipulated that participants must be sex workers aged 15 years or older and possess  
69 proficiency in Punjabi or Urdu. Participants were recruited through the *Dostana Male Health Society*, a  
70 recognized society that addresses key populations' healthcare concerns. Due to Pakistan's societal and  
71 cultural barriers, engaging with individuals in these marginalized communities is challenging. As a solution,  
72 community members were educated and guided to gather data from the sex workers population enlisted  
73 through *Dostana*.

74 The data collection process involved structured interviews. After the necessary training, data enumerators  
75 administered the structured questionnaires through one-on-one interviews. This method ensured that the  
76 process was consistent, comprehensive, and aimed at minimizing potential bias or misinterpretation of the  
77 questions. The data were collected on demographic characteristics, common risk factors, and history of  
78 HIV.

### 79 **Ethical Considerations**

80 The study protocol is reviewed and approved by the Bioethics Committee of the Cancer Research Centre,  
81 University of the Punjab. All participants provided informed written consent before participating in the  
82 study. The study is conducted following the Declaration of Helsinki.

### 83 **Serological Testing**

84 Blood samples are collected from participants for serological testing. The presence of HCV antibodies is  
85 determined using the SD BIOLINE HCV Hepatitis C Virus Antibody Test. All tests are conducted in a  
86 certified laboratory following standard procedures.

## 87 **Statistical Analysis**

- 88 Descriptive statistics are used to summarize the demographic characteristics of the participants and the
- 89 Prevalence of HCV. All analyses are performed using MS Excel.

## 90 Results

### 91 Demographic Characteristics of the Study Participants

92 The study comprised a total of 1000 participants, with a significant majority being men (87.7%) and a  
93 smaller proportion being women (12.3%) (**Table 1**). The participants spanned a wide age range, with the  
94 largest group falling within the 26-35 years category (39.9%). This was followed by the 18-25 years age  
95 group (25.0%), the 36-45 years age group (20.8%), those older than 45 years (13.3%), and a small fraction  
96 under 18 years (1.0%) (**Table 1**).

97

98

99

100

101

102

103

104

105

106

| Demographic Criteria             | Number of Participants |     |       |
|----------------------------------|------------------------|-----|-------|
|                                  | Total                  | Men | Women |
| <b>Number of Participants</b>    | <b>1000</b>            | 877 | 123   |
| <b>Age Distribution</b>          |                        |     |       |
| <18                              | 10                     | 10  | 0     |
| 18-25                            | 250                    | 238 | 12    |
| 26-35                            | 399                    | 350 | 49    |
| 36-45                            | 208                    | 180 | 28    |
| >45                              | 133                    | 99  | 34    |
| <b>Years of Formal Education</b> |                        |     |       |
| 0                                | 471                    | 399 | 72    |
| ≤8                               | 229                    | 209 | 20    |
| 9-12                             | 229                    | 206 | 23    |
| >12                              | 71                     | 63  | 8     |
| <b>Marital Status</b>            |                        |     |       |
| Married                          | 611                    | 523 | 88    |
| Single                           | 388                    | 353 | 35    |
| <b>HIV Status</b>                |                        |     |       |
| HIV Positive                     | 1                      | 1   | 0     |
| HIV Negative                     | 998                    | 876 | 122   |

107 Regarding years of formal education, a significant proportion of the participants had not received formal  
108 education (47.1%). Those with eight years or less of formal education constituted 22.9% of the participants,  
109 while those with 9-12 years also comprised 22.9% of the total. A small fraction of the participants had more

110 than 12 years of formal education (7.1%). Most participants were married (61.1%), while a substantial  
111 proportion were single (38.8%) (**Table 1**).

112 The study also evaluated the HIV seroprevalence of participants. The vast majority were found to be HIV  
113 negative (99.8%), with only one individual (0.1%) being HIV positive.

## 114 **HCV Seroprevalence of the Study Participants**

115 Next, the seroprevalence of HCV was assessed in this cohort of sex workers. Overall, HCV antibodies were  
116 found in 15% of the population, suggesting that these individuals had been exposed to the virus at some  
117 point (**Fig 1a**).

118 **Fig 1. Prevalence of HCV seropositivity among Pakistani Sex Workers.** (a) A pie-chart displaying  
119 seroprevalence of HCV in overall study population (n=1000). (b) A pie-chart displaying seroprevalence of  
120 HCV in male sex workers population. (c) A pie-chart displaying seroprevalence of HCV in female sex  
121 workers population.

122 When the data is analyzed based on sex, notable disparities become evident. Among male sex workers, the  
123 seroprevalence of HCV was 12%, whereas a significantly higher seroprevalence of 31% was observed in  
124 female sex workers (**Fig 1b-c**).

125 This difference in seroprevalence between male and female sex workers indicates a higher likelihood of  
126 past or present HCV infection among the female participants. However, it is imperative to note the  
127 significantly larger male sample size when interpreting these findings.

## 128 **Association of HCV seroprevalence with selected demographic** 129 **characteristics**

130 Among participants aged less than 18 years, there were no positive cases of HCV detected, however, this  
131 age group only included male participants (**Fig 2a-c**). In the age group of 18-25 years, HCV seropositivity



132 was relatively low in both males (6.4%) and females (8.3%). The seropositivity percentage gradually  
133 increased with age in both sexes. In the 26-35 age bracket, HCV seropositivity increased to 12.8% in males  
134 and 14.3% in females. A more pronounced rise in seropositivity was observed in the 36-45 years age group,  
135 with rates reaching 23.6% in males and 53.6% in females. Similarly, in the age group over 45 years, the  
136 seropositivity rate was 22.6% for males and 44.1% for females. These data suggest that HCV seropositivity  
137 increases with age in both sexes, with female sex workers showing a sharper rise and overall higher  
138 seroprevalence than their male counterparts.

139 **Fig 2: Prevalence of HCV seropositivity and associated risk factors in Pakistani sex workers**  
140 **population. (a)** Age-adjusted HCV seroprevalence in overall sex workers population **(b)** Age-adjusted  
141 HCV seroprevalence in male sex workers population **(c)** Age-adjusted HCV seroprevalence in female sex  
142 workers population **(d)** Education-wise HCV seroprevalence in overall sex workers population **(e)**  
143 Education-wise HCV seroprevalence in male sex workers population **(f)** Education-wise HCV  
144 seroprevalence in female sex workers population. The total number of sex workers in each age **(a, b, c)** and  
145 education **(d, e, f)** groups are plotted on left y-axis and represented as verticle gray bars and HCV  
146 seropostivity percentage is plotted on right y-axis and represented as a yellow stacked line.

147 Our data reveal a link between levels of formal education and HCV seroprevalence among the sex workers  
148 in our study. The HCV seroprevalence was 14.2% for participants without formal education **(Fig 2d)**.  
149 Among those with  $\leq 8$  years of education, the seroprevalence rose slightly to 17.0%. For individuals with  
150 9-12 years of education, the seroprevalence dropped to 13.1%. Interestingly, participants with more than  
151 12 years of education had a seroprevalence of 14.1%.

152 On analyzing the data based on sex **(Fig 2e-f)**, it was noted that male sex workers with no education had a  
153 lower seroprevalence of HCV at 12.0%, whereas the figure for their female counterparts was considerably  
154 higher at 26.4%. In participants with  $\leq 8$  years of education, the seroprevalence was 14.4% for men and  
155 sharply increased to 45.0% for women. Among individuals with 9-12 years of formal education, the

156 positivity rate dropped to 11.2% in men and 30.4% in women. For those with >12 years of education, the  
157 seroprevalence was lower in men (11.1%) compared to women (37.5%).

158 Among married male sex workers, the seroprevalence was 15.1%, whereas, for single males, it was  
159 significantly lower at 8.2% (**Table 2**). On the other hand, among female sex workers, married individuals  
160 showed a considerably higher seroprevalence at 35.2%, compared to single females who had a  
161 seroprevalence of 20.0%.

**Table 2: Marital Status-Based Analysis.**

| Sex    | Marital Status | Total Participants | Positivity % |
|--------|----------------|--------------------|--------------|
| Male   | Married        | 523                | 15.10516     |
| Male   | Single         | 353                | 8.215297     |
| Female | Married        | 88                 | 35.22727     |
| Female | Single         | 35                 | 20           |

162

## 163 **Identified Risk Factors and Their Relationship to HCV**

### 164 **Seroprevalence**

165 Next, we analyzed the impact of Identified risk factors on HCV seroprevalence in male and female sex  
166 workers (**Table 3**). In the context of shaving practices, individuals shaving at home had a higher overall  
167 HCV seropositivity of 18.97% compared to those using salon services (12.62%) or both (13.27%). This  
168 trend was consistent among men, with 10.81% positivity in those who shaved at home versus 12.58% and  
169 13.54% for those who used salon services and both, respectively. However, for women, the pattern  
170 diverged. Women who shaved at home had a significantly high HCV seropositivity of 33.33%, while  
171 women who used salon services showed seropositivity of 14.29%.

172

| <b>Risk Factor</b>           | <b>Exposure</b> | <b>Sex</b> | <b>Participant Number</b> | <b>HCV Seropositivity %</b> |
|------------------------------|-----------------|------------|---------------------------|-----------------------------|
| Source of Shaving            | Home            | Overall    | 290                       | 18.96551724                 |
|                              | Salon           | Overall    | 610                       | 12.62295082                 |
|                              | Both            | Overall    | 98                        | 13.26530612                 |
|                              | Home            | Men        | 185                       | 10.81081081                 |
|                              | Salon           | Men        | 596                       | 12.58389262                 |
|                              | Both            | Men        | 96                        | 13.54166667                 |
|                              | Home            | Women      | 105                       | 33.33333333                 |
|                              | Salon           | Women      | 14                        | 14.28571429                 |
|                              | Both            | Women      | 2                         | 0                           |
| Sharing of Blade             | Yes             | Overall    | 41                        | 19.5122                     |
|                              | No              | Overall    | 957                       | 14.31557                    |
|                              | Yes             | Men        | 39                        | 20.51282                    |
|                              | No              | Men        | 838                       | 11.93317                    |
|                              | Yes             | Women      | 2                         | 0                           |
|                              | No              | Women      | 119                       | 31.09244                    |
| Sharing of Toothbrush        | Yes             | Overall    | 37                        | 13.51351                    |
|                              | No              | Overall    | 963                       | 14.64174                    |
|                              | Yes             | Men        | 36                        | 11.11111                    |
|                              | No              | Men        | 841                       | 12.36623                    |
|                              | Yes             | Women      | 1                         | 100                         |
|                              | No              | Women      | 122                       | 30.32787                    |
| History of Surgery           | Yes             | Overall    | 150                       | 18.66667                    |
|                              | No              | Overall    | 850                       | 13.88235                    |
|                              | Yes             | Men        | 137                       | 13.86861                    |
|                              | No              | Men        | 740                       | 12.02703                    |
|                              | Yes             | Women      | 13                        | 69.23077                    |
|                              | No              | Women      | 110                       | 26.36364                    |
| History of Blood Transfusion | Yes             | Overall    | 178                       | 17.97753                    |
|                              | No              | Overall    | 822                       | 13.86861                    |
|                              | Yes             | Men        | 164                       | 15.2439                     |
|                              | No              | Men        | 713                       | 11.64095                    |
|                              | Yes             | Women      | 14                        | 50                          |
|                              | No              | Women      | 109                       | 28.44037                    |
| History of Injection         | Yes             | Overall    | 189                       | 15.34392                    |
|                              | No              | Overall    | 811                       | 14.42663                    |
|                              | Yes             | Men        | 168                       | 11.30952                    |
|                              | No              | Men        | 709                       | 12.55289                    |
|                              | Yes             | Women      | 21                        | 47.61905                    |
|                              | No              | Women      | 102                       | 27.45098                    |
| History of Dental Procedure  | Yes             | Overall    | 79                        | 22.78481                    |
|                              | No              | Overall    | 921                       | 13.89794                    |

|                            |     |         |     |          |
|----------------------------|-----|---------|-----|----------|
|                            | Yes | Men     | 70  | 18.57143 |
|                            | No  | Men     | 807 | 11.772   |
|                            | Yes | Women   | 9   | 55.55556 |
|                            | No  | Women   | 114 | 28.94737 |
| History of Hospitalization | Yes | Overall | 147 | 21.76871 |
|                            | No  | Overall | 853 | 13.3646  |
|                            | Yes | Men     | 132 | 17.42424 |
|                            | No  | Men     | 745 | 11.4094  |
|                            | Yes | Women   | 15  | 60       |
|                            | No  | Women   | 108 | 26.85185 |
| History of Drug Abuse      | Yes | Overall | 14  | 21.42857 |
|                            | No  | Overall | 986 | 14.50304 |
|                            | Yes | Men     | 12  | 25       |
|                            | No  | Men     | 865 | 12.13873 |
|                            | Yes | Women   | 2   | 0        |
|                            | No  | Women   | 121 | 31.40496 |

173

174 Sharing of blades revealed a slightly higher overall HCV seropositivity among individuals men who shared  
 175 blades had significantly higher seropositivity (20.51%) than those who did not (11.93%). For sharing  
 176 toothbrushes, the overall HCV seropositivity was lower in those who shared (13.51%) than those who did  
 177 not (14.64%).

178 History of surgery showed a pattern where individuals with a surgical history had higher overall HCV  
 179 seropositivity (18.67%) than those without (13.88%). This was mirrored in men with a history of surgery  
 180 (13.87%) versus those without (12.03%). However, among women, a striking difference was observed.  
 181 Women with a surgical history exhibited an alarmingly high HCV seropositivity rate of 69.23%, whereas  
 182 women without a surgical history demonstrated a seropositivity rate of 26.36%.

183 The pattern of other risk factors such as blood transfusion history, history of injections, dental procedures,  
 184 hospitalization, and drug abuse revealed similar patterns. All risk factors showed higher HCV seropositivity  
 185 rates among those exposed to the risk factor, with the differences being more pronounced among women  
 186 compared to men. Notably, these differences among women should be interpreted with caution due to the  
 187 smaller sample sizes.

## 188 **Discussion**

189 The presented work studied the seroprevalence of the Hepatitis C Virus (HCV) among sex workers in  
190 Pakistan. This work aimed to examine the extent of HCV exposure within this marginalized community,  
191 identify any disparities in seroprevalence between sexes, and study the association of seroprevalence with  
192 various demographic characteristics and risk factors. Our study population predominantly consisted of men  
193 (87.7%), with women making up 12.3%. The overall seroprevalence of HCV antibodies, indicative of  
194 exposure to the virus, was 15%. Notably, a marked gender disparity was observed, with male sex workers  
195 exhibiting a seroprevalence of 12%, while their female counterparts showed a significantly higher  
196 seroprevalence of 31%. We also found variations in seroprevalence across different age groups, educational  
197 levels, and marital statuses. It was observed that increasing age, lower education, and marriage were  
198 associated with higher seroprevalence.

199 Studies focusing on HCV seroprevalence among sex workers have yielded diverse results. For example,  
200 research conducted in Thailand (21) revealed a relatively low HCV prevalence of 2.3% among migrant sex  
201 workers, contrasting sharply with a Glasgow-based study (15) that reported a striking 81% HCV  
202 seroprevalence among female street sex workers who inject drugs. Meanwhile, a Canadian study (14)  
203 documented a baseline prevalence of 42.7% among female sex workers. A study from Brazil [4] also  
204 indicated a higher exposure prevalence to HCV, at 7.7%, among female sex workers. These findings  
205 underscore the significant variability in HCV seroprevalence across different regions and populations of  
206 sex workers, shedding light on the impact of various risk factors, demographic characteristics, and regional  
207 healthcare infrastructures.

208 Our study found pronounced disparities in HCV seroprevalence between male and female sex workers.  
209 This finding aligns with existing literature documenting elevated rates of HCV seroprevalence among  
210 female sex workers (14). The heightened vulnerability of female sex workers is often a byproduct of  
211 precarious working conditions, limited access to healthcare, and an increased likelihood of injecting drug

212 use—each a significant contributor to elevated HCV risk (17). The intersection of sex work and drug use  
213 is particularly accentuated among female sex workers (14, 17), amplifying their susceptibility to HCV  
214 infection. The multifaceted, gender-specific risks inherent in sex work necessitate the development of  
215 tailored interventions and harm reduction strategies. These strategies should address the unique needs and  
216 challenges faced by female sex workers, particularly in enhancing access to HCV prevention and healthcare  
217 services.

218 Several studies have reported high HCV seroprevalence among men who have sex with men (MSM) (22-  
219 24). However, only a few studies have undertaken a comparative analysis of sex-based differences among  
220 sex workers (25, 26). There is a pressing need for additional research to further elucidate the variations in  
221 HCV prevalence rates based on gender within the sex worker population.

222 We observed an increase in HCV seropositivity with advancing age, particularly among female sex  
223 workers. This demographic exhibited a sharper rise and consistently higher seroprevalence than their male  
224 counterparts. This age-related increase in HCV seropositivity is consistent with several other studies (9),  
225 suggesting a cumulative risk of exposure and infection over time (9). The more pronounced increase among  
226 female sex workers could be attributed to many factors, including prolonged exposure to high-risk  
227 environments, compounded vulnerabilities, and potential barriers to accessing preventive services and  
228 healthcare.

229 A noticeable relationship was observed between years of formal education and HCV seroprevalence among  
230 the participating sex workers. Individuals with lower educational levels exhibited higher rates of HCV  
231 seroprevalence, a markedly pronounced trend among female sex workers. This observed association  
232 between education and HCV seroprevalence underscores the importance of addressing educational  
233 disparities as a critical determinant of health. Tailored interventions to enhance health literacy and improved  
234 access to education, are essential for reducing HCV seroprevalence and promoting health equity within this  
235 population.

236 Our data indicates a notable difference in HCV seroprevalence in relation to marital status, particularly  
237 among female sex workers. Married female sex workers manifested a considerably elevated seroprevalence  
238 compared to their single counterparts. One plausible explanation for this occurrence could be that married  
239 individuals may face complexities related to spousal relationships, familial responsibilities, and societal  
240 expectations, potentially influencing their risk behaviors and access to healthcare. The dynamics of marital  
241 relationships, including the potential for intimate partner violence and power imbalances, may limit the  
242 autonomy of married female sex workers in negotiating safer practices and accessing preventive services.  
243 Additionally, married female sex workers might experience dual sources of stigma and discrimination—  
244 both as sex workers and as married women engaged in sex work. This compounded stigma can pose barriers  
245 to healthcare access, hinder utilization of harm reduction services, and exacerbate vulnerabilities to  
246 infections such as HCV (27, 28).

247 This study also examined the impact of various identified risk factors on HCV seroprevalence. The sharing  
248 of blades emerged as a significant risk factor, with individuals engaging in this practice demonstrating  
249 higher seropositivity. This observation aligns with the established knowledge that sharing sharp objects can  
250 facilitate the transmission of blood-borne viruses like HCV, underscoring the importance of promoting safe  
251 practices and awareness. Individuals with a surgical history, especially women, manifested alarmingly high  
252 HCV seropositivity rates. This finding accentuates the critical role of medical procedures as potential  
253 avenues for HCV transmission, necessitating stringent infection control measures and adherence to  
254 sterilization protocols in healthcare settings. The exploration of other risk factors such as blood transfusion  
255 history, history of injections, dental procedures, hospitalization, and drug abuse revealed analogous  
256 patterns. These factors contributed to elevated HCV seropositivity rates, with the disparities being more  
257 pronounced among women. The heightened vulnerability of women to these risk factors necessitates a  
258 gender-sensitive approach to addressing HCV transmission.

259 One of the major limitations of our study is the smaller sample size of female participants. This  
260 disproportion in representation between male and female participants could potentially introduce bias and

261 affect the robustness of the associations and patterns observed, particularly in relation to gender-specific  
262 findings. This smaller female cohort size limits the generalizability of our findings to the broader population  
263 of female sex workers in Pakistan and beyond. The gender-specific disparities and trends observed in our  
264 study warrant further exploration through more extensive, more representative studies focusing on female  
265 sex workers. Another potential limitation of our study is the self-reported data, which may be subject to  
266 recall bias. Despite these limitations, our study contributes valuable insights into the HCV seroprevalence  
267 among sex workers in Pakistan, laying the groundwork for future research and interventions tailored to  
268 address the unique needs and vulnerabilities of this population. The insights garnered from this research  
269 underscore the pressing need for concerted action and commitment to address the health disparities faced  
270 by sex workers and to foster an environment conducive to their well-being and access to healthcare.

## 271 **Acknowledgments**

272 We would like to offer our gratitude to all the community members who helped us in sampling and  
273 collecting data from this marginalized community.

## 274 **Declarations**

### 275 **Generative AI**

276 *During the preparation of this work the author(s) used ChatGPT for editing the manuscript. After using this tool, the*  
277 *author(s) reviewed and edited the content as needed and take(s) full responsibility for the content of the publication.*



## 278 **References**

- 279 1. Alter MJ. Epidemiology of hepatitis C virus infection. *World journal of gastroenterology: WJG*.  
280 2007;13(17):2436.
- 281 2. Lanini S, Easterbrook PJ, Zumla A, Ippolito G. Hepatitis C: global epidemiology and strategies for  
282 control. *Clin Microbiol Infect*. 2016;22(10):833-8.
- 283 3. Petruzzello A, Marigliano S, Loquercio G, Cozzolino A, Cacciapuoti C. Global epidemiology of  
284 hepatitis C virus infection: An up-date of the distribution and circulation of hepatitis C virus genotypes.  
285 *World J Gastroenterol*. 2016;22(34):7824-40.
- 286 4. Lewis KC, Barker LK, Jiles R, Gupta N. Estimated prevalence and awareness of hepatitis C virus  
287 infection among U.S. adults- National Health and Nutrition Examination Survey, January 2017-March  
288 2020. *Clin Infect Dis*. 2023.
- 289 5. Daw M, El-Bouzedi A, Ahmed M, Dau A, Agnan M, Edrah A. Geographic integration of hepatitis  
290 C virus: A global threat. *World Journal of Virology*. 2016;12:1-13.
- 291 6. Abdelhakam SA, Othman MA. Social, cultural, and political factors influencing HCV in  
292 developing countries. *Hepatitis C in Developing Countries: Elsevier*; 2018. p. 33-8.
- 293 7. Edmunds BL, Miller ER, Tsourtos G. The distribution and socioeconomic burden of Hepatitis C  
294 virus in South Australia: a cross-sectional study 2010-2016. *BMC Public Health*. 2019;19(1):527.
- 295 8. Ryerson AB, Schillie S, Barker LK, Kupronis BA, Wester C. Vital Signs: Newly Reported Acute  
296 and Chronic Hepatitis C Cases - United States, 2009-2018. *MMWR Morb Mortal Wkly Rep*.  
297 2020;69(14):399-404.
- 298 9. Reid M, Price JC, Tien PC. Hepatitis C Virus Infection in the Older Patient. *Infect Dis Clin North*  
299 *Am*. 2017;31(4):827-38.
- 300 10. Yue T, Zhang Q, Cai T, Xu M, Zhu H, Pourkarim MR, et al. Trends in the disease burden of HBV  
301 and HCV infection in China from 1990-2019. *Int J Infect Dis*. 2022;122:476-85.

- 302 11. El-Serag HB, Kramer J, Duan Z, Kanwal F. Epidemiology and outcomes of hepatitis C infection  
303 in elderly US Veterans. *J Viral Hepat.* 2016;23(9):687-96.
- 304 12. Prati D. Transmission of hepatitis C virus by blood transfusions and other medical procedures: a  
305 global review. *J Hepatol.* 2006;45(4):607-16.
- 306 13. Miranda N, de Souza RL, Monteiro JC, Costa IB, Siravenha LQ, da Luz ALB, et al. Seroprevalence  
307 of HBV and HCV in female sex workers from four cities in the state of Pará, northern Brazil. *Journal of*  
308 *medical virology.* 2021;93(6):3730-7.
- 309 14. Goldenberg SM, Montaner J, Braschel M, Socias E, Guillemi S, Shannon K. Dual sexual and drug-  
310 related predictors of hepatitis C incidence among sex workers in a Canadian setting: gaps and opportunities  
311 for scale-up of hepatitis C virus prevention, treatment, and care. *Int J Infect Dis.* 2017;55:31-7.
- 312 15. Taylor A, Hutchinson SJ, Gilchrist G, Cameron S, Carr S, Goldberg DJ. Prevalence and  
313 determinants of hepatitis C virus infection among female drug injecting sex workers in Glasgow. *Harm*  
314 *reduction journal.* 2008;5:11.
- 315 16. Uuskula A, Fischer K, Raudne R, Kilgi H, Krylov R, Salminen M, et al. A study on HIV and  
316 hepatitis C virus among commercial sex workers in Tallinn. *Sex Transm Infect.* 2008;84(3):189-91.
- 317 17. Socias ME, Shannon K, Montaner JS, Guillemi S, Dobrer S, Nguyen P, et al. Gaps in the hepatitis  
318 C continuum of care among sex workers in Vancouver, British Columbia: Implications for voluntary  
319 hepatitis C virus testing, treatment and care. *Can J Gastroenterol Hepatol.* 2015;29(8):411-6.
- 320 18. Waheed Y, Shafi T, Safi SZ, Qadri I. Hepatitis C virus in Pakistan: a systematic review of  
321 prevalence, genotypes and risk factors. *World J Gastroenterol.* 2009;15(45):5647-53.
- 322 19. Saleem NH, Adrien A, Razaque A. Risky sexual behavior, knowledge of sexually transmitted  
323 infections and treatment utilization among a vulnerable population in Rawalpindi, Pakistan. *Southeast*  
324 *Asian J Trop Med Public Health.* 2008;39(4):642-8.
- 325 20. Ahsan A, Khan AZ, Javed H, Mirza S, Chaudhary SU, Shahzad-UI-Hussan S. Estimation of  
326 hepatitis C prevalence in the Punjab province of Pakistan: A retrospective study on general population.  
327 *PLoS One.* 2019;14(4):e0214435.

- 328 21. Hongjaisee S, Khamduang W, Sripan P, Choyrum S, Thepbundit V, Kosashunhanan N, et al.  
329 Uncommon hepatitis C virus among migrant sex workers in Chiangmai, Thailand. *Clinical microbiology*  
330 *and infection* : the official publication of the European Society of Clinical Microbiology and Infectious  
331 Diseases. 2021;27(10):1523-5.
- 332 22. Jin F, Dore GJ, Matthews G, Luhmann N, Macdonald V, Bajis S, et al. Prevalence and incidence  
333 of hepatitis C virus infection in men who have sex with men: a systematic review and meta-analysis. *Lancet*  
334 *Gastroenterol Hepatol*. 2021;6(1):39-56.
- 335 23. Hoornenborg E, Achterbergh RCA, Schim van der Loeff MF, Davidovich U, Hogewoning A, de  
336 Vries HJC, et al. MSM starting preexposure prophylaxis are at risk of hepatitis C virus infection. *AIDS*.  
337 2017;31(11):1603-10.
- 338 24. Tirmizi R, Munir R, Zaidi N. Trends in Hepatitis C Virus Seroprevalence and Associated Risk  
339 Factors among MSM in Pakistan: Insights from a Community-Based Study. medRxiv.  
340 2023:2023.09.19.23295785.
- 341 25. Kassak K, Mahfoud Z, Kreidieh K, Shamra S, Afifi R, Ramia S. Hepatitis B virus and hepatitis C  
342 virus infections among female sex workers and men who have sex with men in Lebanon: prevalence, risk  
343 behaviour and immune status. *Sex Health*. 2011;8(2):229-33.
- 344 26. Saludes V, Folch C, Morales-Carmona A, Ferrer L, Fernandez-Lopez L, Munoz R, et al.  
345 Community-based screening of hepatitis C with a one-step RNA detection algorithm from dried-blood  
346 spots: Analysis of key populations in Barcelona, Spain. *J Viral Hepat*. 2018;25(3):236-44.
- 347 27. Khan S, Shah S, Ashraf H. Predictive factors for acquiring HCV infection in the population residing  
348 in high endemic, resource-limited settings. *J Family Med Prim Care*. 2021;10(1):167-74.
- 349 28. Rashti R, Alavian SM, Moradi Y, Sharafi H, Mohamadi Bolbanabad A, Roshani D, et al. Global  
350 prevalence of HCV and/or HBV coinfections among people who inject drugs and female sex workers who  
351 live with HIV/AIDS: a systematic review and meta-analysis. *Arch Virol*. 2020;165(9):1947-58.
- 352

Figure 1

(a) Overall

■ Positive % ■ Negative %

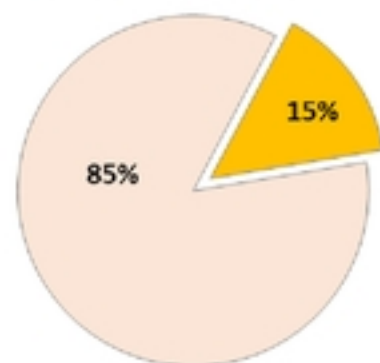

(b) Male

■ Positive % ■ Negative %

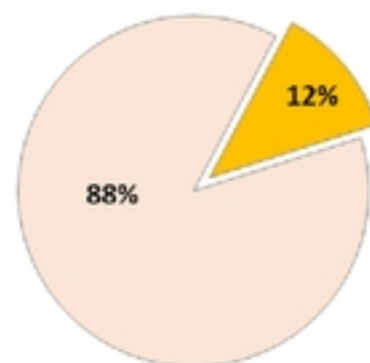

(c) Female

■ Positive % ■ Negative %

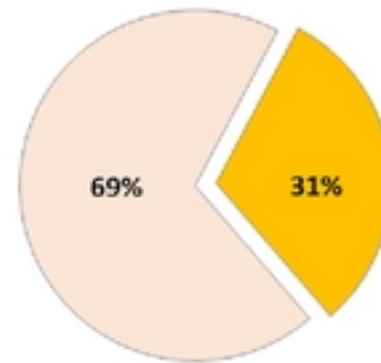

Fig 1

Figure 2

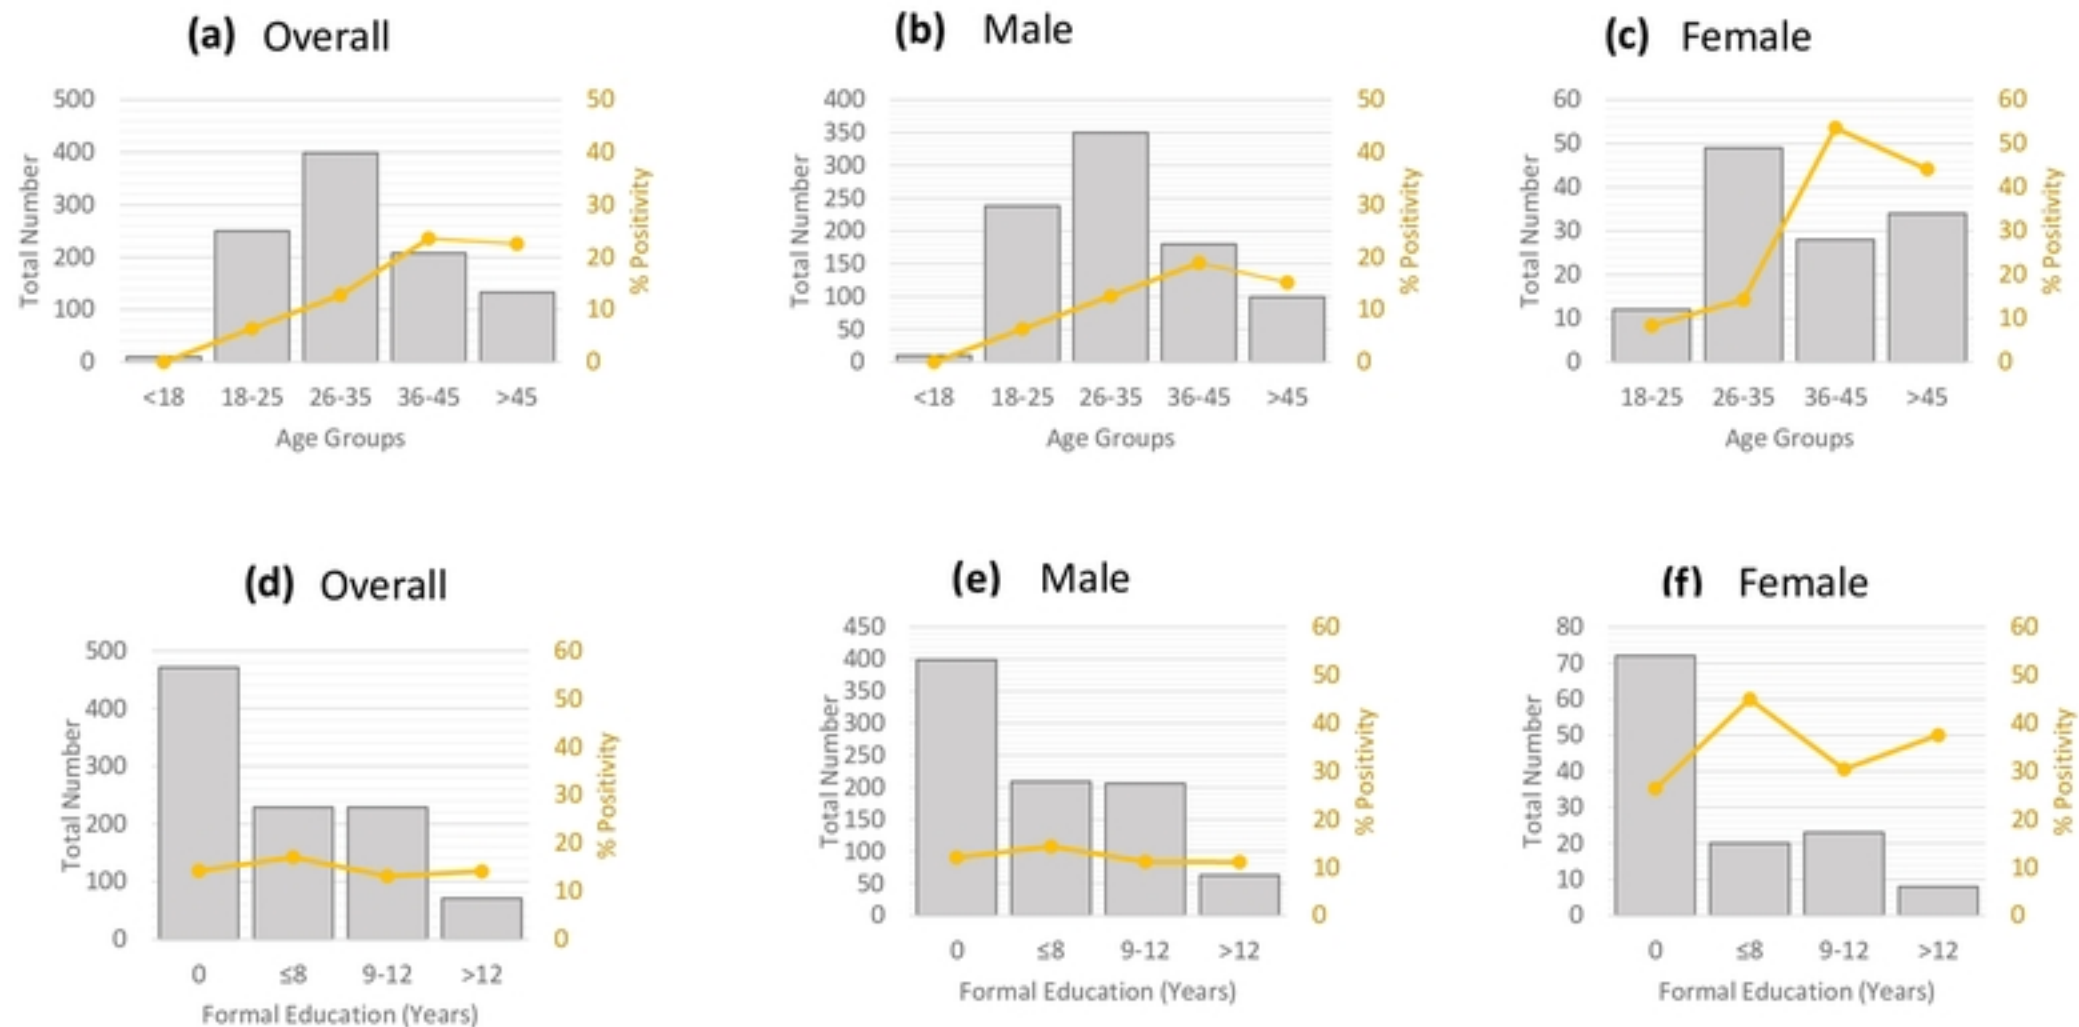

Fig 2
